# Supplementary material for: Polypyrrole-Stabilized Polypeptide for Eco-Friendly Supercapacitors
Source: MDPI journal article supplement (doi:10.3390/ijms24032497), 2023-01-27
Supplement: s1 [file s1]

# Supplementary Materials: Polypyrrole-Stabilized Polypeptide for Eco-Friendly Supercapacitors

Zhe Li, Kuan Hu, Zhou Li, Cong Li and Yulin Deng

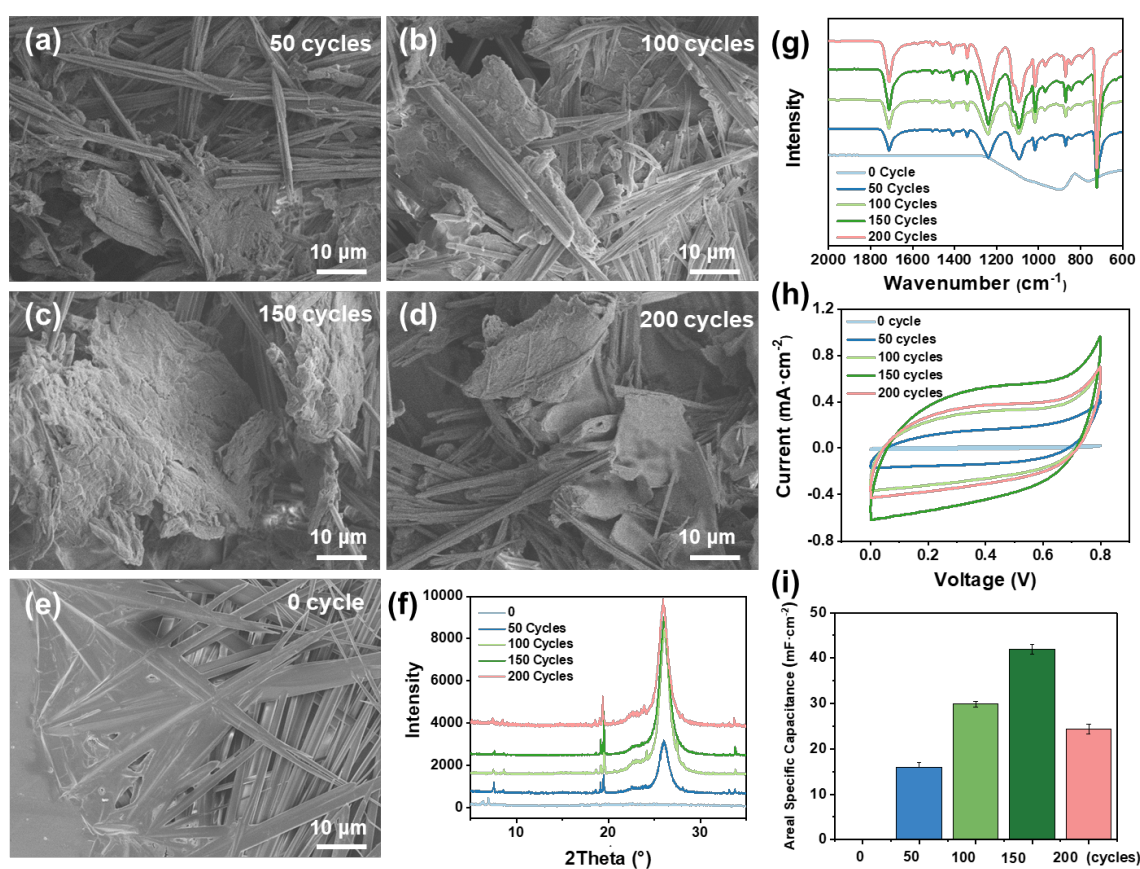

**Figure S1.** Characterization and electrochemical property of FF/PPy films with different deposition cycles. (a-e) Micro morphologies of FF/PPy with different electrodeposition cycles. (a) 50 cycles; (b) 100 cycles; (c) 150 cycles; (d) 200 cycles. (e) SEM image of FF (0 cycle). (f) XRD patterns. (g) Fourier infrared spectrum (FTIR). (h) CV curves at  $100\text{ mV}\cdot\text{s}^{-1}$ ; (i) Areal specific capacitances calculated from the CV curves.

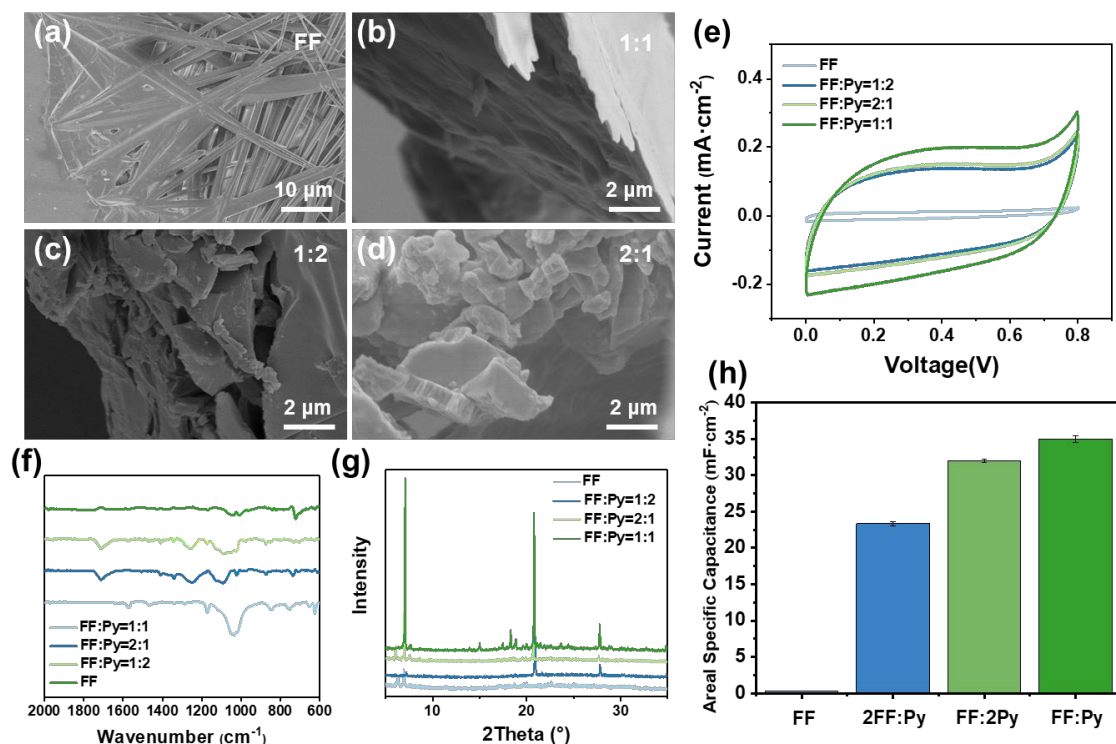

**Figure S2.** Characterization and electrochemical property of FF-Py copolymers with different ratio of FF and Py. (a-d). SEM images of FF-Py copolymers with three different ratios of FF and Py. (a) Pure FF; (b) FF:Py = 1:1; (c) FF:Py = 1:2 and (d) FF:Py = 2:1. (e). FTIR spectrum. (f). XRD pattern. (g). CV curves. (h). Areal specific capacitance.

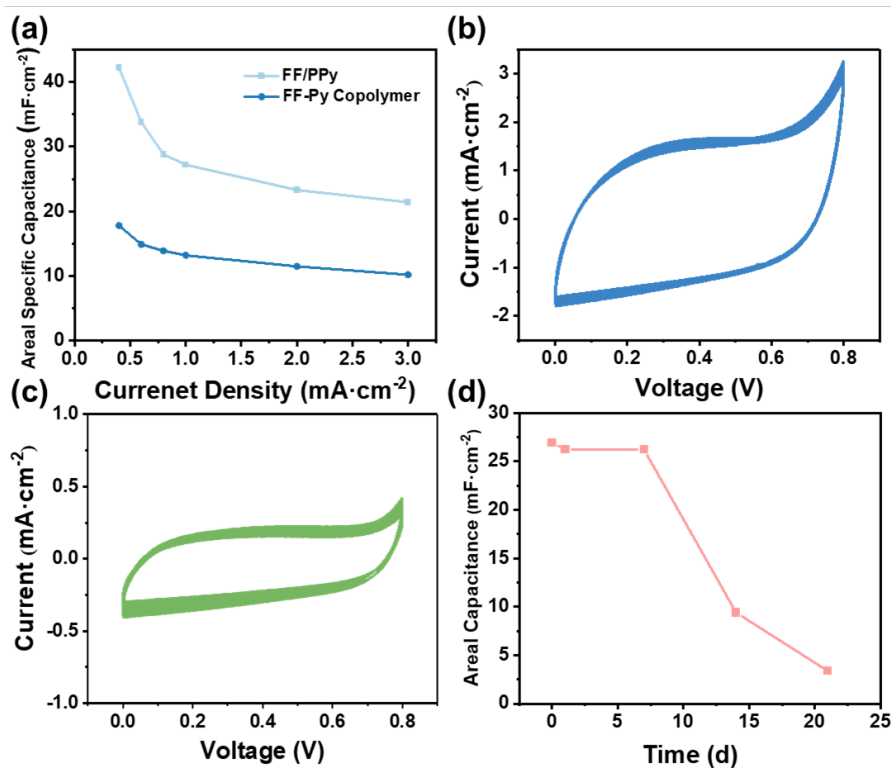

**Figure S3.** (a) Areal specific capacitances of SCs based on FF/PPy and FF-Py copolymer films with different scan rates; cycle stability test of SCs based on FF/PPy (b) and FF-Py copolymer (c) films with the current density of 0.2  $\text{mA}\cdot\text{cm}^{-2}$  at 0.8 V; (d) the variation of areal specific capacitances during the degradation.

**Table S1.** A comparison with recently developed peptide-based nanomaterials and hybrids electrode materials and electrochemical performances.

| Electrode Materials                                                                                                                      | Electrolyte                                                    | Specific Capacitance                  | Current Density/Scan Rate         | Cycle Number & Capacitance Retention                                      | Degradable | Ref. |
|------------------------------------------------------------------------------------------------------------------------------------------|----------------------------------------------------------------|---------------------------------------|-----------------------------------|---------------------------------------------------------------------------|------------|------|
| Glassy carbon with peptides BDCP-1-R                                                                                                     | 0.05M $\text{KH}_2\text{PO}_4$ and 0.5M $\text{KCl}$           | 2.35 $\text{mF}\cdot\text{cm}^{-2}$   | 50 $\text{mA}\cdot\text{cm}^{-2}$ | 80% after 5000 cycles at a scan rate of 0.4 $\text{mV}\cdot\text{s}^{-1}$ | No         | [21] |
| Fmoc-EF-NH <sub>2</sub> peptide@TiO <sub>2</sub>                                                                                         | PVA/H <sub>3</sub> PO <sub>4</sub> gel                         | 8.6 $\text{mF}\cdot\text{cm}^{-2}$    | 10 $\text{mV}\cdot\text{s}^{-1}$  | > 95% after 5000 cycles                                                   | No         | [29] |
| Benzo selenadiazole-5-carbonyl-protected dipeptide cross-linked with cobalt hydroxide (BSeYY/Co(OH) <sub>2</sub> ) on carbon fiber paper | 1 M $\text{KOH}$ and 1 M $\text{LiOH}$                         | 974.78 $\text{F}\cdot\text{g}^{-1}$   | 1 $\text{A}\cdot\text{g}^{-1}$    | 78.62% after 3000 cycles                                                  | No         | [33] |
| Ni foam with uniform branched MnO <sub>2</sub> /peptide hybrid nanowires                                                                 | 1 M $\text{Na}_2\text{SO}_4$                                   | 421 $\text{F}\cdot\text{g}^{-1}$      | 1 $\text{A}\cdot\text{g}^{-1}$    | 93% after 2500 cycles                                                     | No         | [34] |
| Peptide coated Toray carbon paper                                                                                                        | 0.1 M $\text{K}_2\text{SO}_4$ at pH 7.4 and 0.1 M $\text{KCl}$ | 2210 $\mu\text{F}\cdot\text{cm}^{-2}$ | 50 $\text{mV}\cdot\text{s}^{-1}$  | 500 cycles                                                                | No         | [35] |
| Diphenylamine (FF) peptide nanotubes-coated carbon                                                                                       | 1 M $\text{H}_2\text{SO}_4$                                    | 800 $\text{mF}\cdot\text{cm}^{-2}$    | 100 $\text{mV}\cdot\text{s}^{-1}$ | -                                                                         | No         | [36] |
| Aromatic dipeptide nanotubes-modified carbon                                                                                             | 0.05 M $\text{KH}_2\text{PO}_4$ and 0.5 M $\text{KCl}$         | 120 $\mu\text{F}\cdot\text{cm}^{-2}$  | 100 $\text{mV}\cdot\text{s}^{-1}$ | -                                                                         | No         | [37] |
| FF peptide-modified carbon                                                                                                               | 0.05 M $\text{KH}_2\text{PO}_4$ and 0.5 M $\text{KCl}$         | 240 $\mu\text{F}\cdot\text{cm}^{-2}$  | -                                 | -                                                                         | No         | [38] |
| Aromatic diphenylalanine (FF)-based nanohybrid BSeFF/Ni(OH) <sub>2</sub> –                                                               | 1 M $\text{KOH}$                                               | 1250 $\text{F}\cdot\text{g}^{-1}$     | 2 $\text{A}\cdot\text{g}^{-1}$    | 72% after 1000 cycles                                                     | No         | [39] |

|                                                               |                                               |                                       |                                     |                          |     |           |
|---------------------------------------------------------------|-----------------------------------------------|---------------------------------------|-------------------------------------|--------------------------|-----|-----------|
| deposited nickel foam                                         |                                               |                                       |                                     |                          |     |           |
| FTO electrode coated with unidirectionally aligned FF NTs/MTs | 0.05 M $\text{KH}_2\text{PO}_4$ and 0.5 M KCl | $1000\mu\text{F}\cdot\text{cm}^{-2}$  | $50\text{ mV}\cdot\text{s}^{-1}$    | 90% after 5000 cycles    | No  | [40]      |
| Activated carbon                                              | KOH-saturated mCel-membrane                   | $153.34\text{ mF}\cdot\text{cm}^{-2}$ | $10\text{ mV}\cdot\text{s}^{-1}$    | 84.7% after 10000 cycles | No  | [41]      |
| Peptide- $\text{Co}_9\text{S}_8$ nanobricks                   | KOH/PVA hydrogel                              | $1.3\text{ F}\cdot\text{cm}^{-2}$     | $0.7\text{ mA}\cdot\text{cm}^{-2}$  | 96% after 5000 cycling   | No  | [42]      |
| Water-soluble metal (W, Fe, Mo)                               | Agarose gel                                   | $1.6\text{ mF}\cdot\text{cm}^{-2}$    | $0.15\text{ mA}\cdot\text{cm}^{-2}$ | -                        | Yes | [11]      |
| Activated charcoal                                            | Gatorade                                      | $78.8\text{ F}\cdot\text{g}^{-1}$     | $1\text{ A}\cdot\text{g}^{-1}$      | 92.3% after 1000 cycles  | Yes | [43]      |
| Fe-ZnO on PLA film                                            | PVA/PBS hydrogel                              | $0.36\text{ mF}\cdot\text{cm}^{-2}$   | $10\text{ mV}\cdot\text{s}^{-1}$    | 70% after 3000 cycles    | Yes | [44]      |
| FF/PPy coated Mg/PLA-C plate                                  | PVA/PBS hydrogel                              | $42.6\text{ mF}\cdot\text{cm}^{-2}$   | $0.4\text{ mA}\cdot\text{cm}^{-2}$  | 94.8 % after 5000 cycles | Yes | This work |

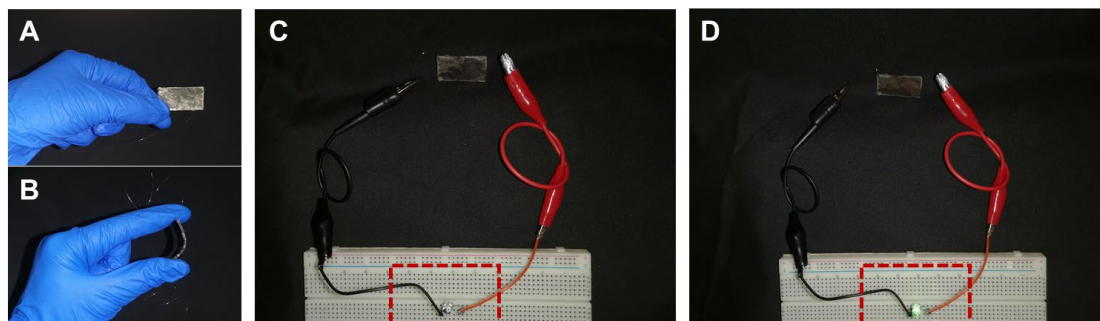

**Figure S4.** Pictures of freshly fabricated FF/PPy-based SCs and practical demonstration using SCs to light up the green LED pattern. (A) The picture of a SC. (B) The SC is flexible. LED (C) before and (D) after power supply with FF/PPy-based SCs.

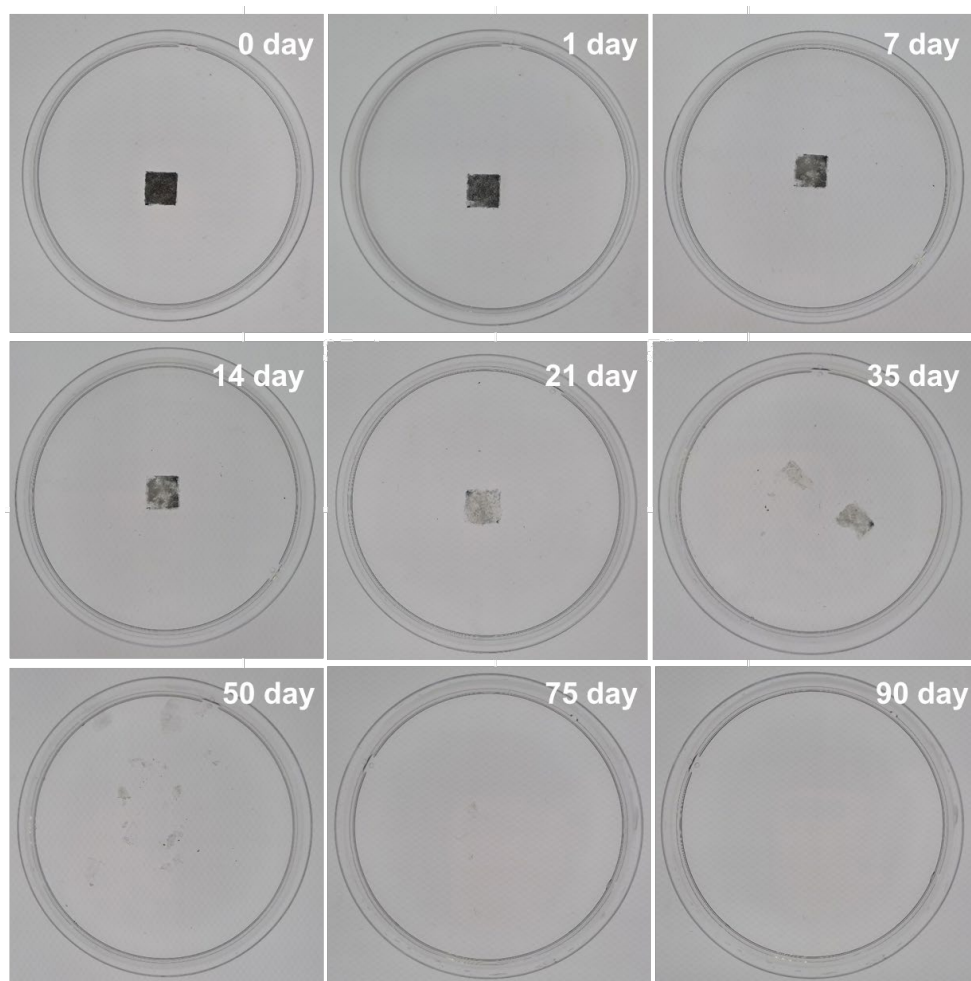

**Figure S5.** In vitro degradation of SCs in 1X PBS buffer at room temperature for 90 days.

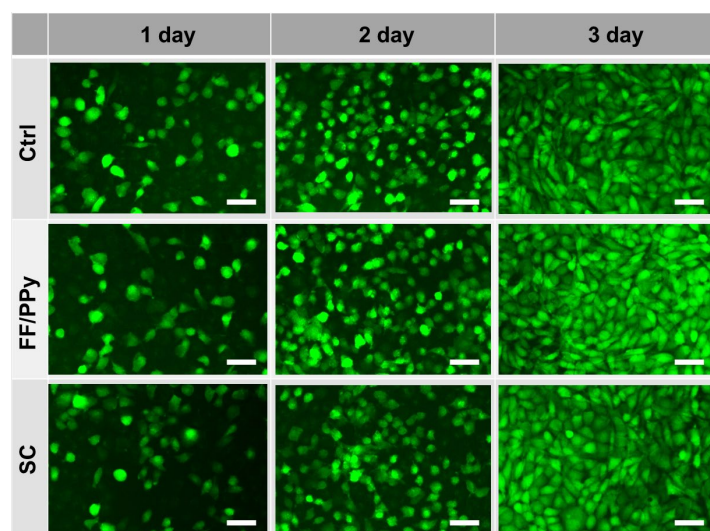

**Figure S6.** Biocompatibility of FF/PPy film and SC. Attachment, proliferation, and morphology of the L929 cells at different times.

Scale bars: 20  $\mu\text{m}$ .
